# Supplementary material for: Nature of the copper-nitrosyl intermediates of copper nitrite reductases during catalysis
Source: PubMed Central journal article supplement (PMC8163067; doi:10.1039/d0sc04797j), 2020-10-20
Supplement: SC-011-D0SC04797J-s002.pdf [file SC-011-D0SC04797J-s002.pdf]

Supporting information

**Table of Contents**

|                                                                                                               |   |
|---------------------------------------------------------------------------------------------------------------|---|
| <b><u>Nature of the copper-nitrosyl intermediates of copper nitrite reductases during catalysis</u></b> ..... | 1 |
| <u>Table of Contents</u> .....                                                                                | 1 |
| <u>DFT method</u> .....                                                                                       | 2 |
| <u>1. {CuNO}<sup>10</sup> - L2, End-on, <math>M_s = 0</math> (BS)</u> .....                                   | 2 |
| <u>2. {CuNO}<sup>10</sup> - L2, Side-on, <math>M_s = 0</math> (BS)</u> .....                                  | 3 |
| <u>3. {CuNO}<sup>11</sup> - L2, Side-on, <sup>2</sup>A''</u> .....                                            | 3 |
| <u>4. {CuNO}<sup>11</sup> - L2, End-on, <sup>2</sup>A''</u> .....                                             | 4 |
| <u>5. {CuNO}<sup>11</sup> - L2, End-on, <sup>2</sup>A'</u> .....                                              | 5 |

## Optimized Cartesian coordinates (Å)

### DFT method

All DFT calculations were carried out with the ADF program system<sup>35</sup>, using the B3LYP<sup>36a,b</sup> exchange-correlation functional (20% Hartree-Fock exchange) and the all-electron Slater-type TZ2P basis sets. The calculations were allowed to break spin symmetry, wherever relevant. Different electronic configurations were studied via a  $C_s$  symmetry constraint and manually specifying electron occupancies for each irreducible representation.

### {CuNO}<sup>10</sup> - L2, End-on, $M_s = 0$ (BS)

|    |              |              |              |
|----|--------------|--------------|--------------|
| Cu | -0.600699000 | 0.989951000  | 0.000000000  |
| B  | -0.821163000 | -2.102475000 | 0.000000000  |
| C  | 0.692489000  | -1.561710000 | 0.000000000  |
| C  | 1.983791000  | -2.245301000 | 0.000000000  |
| C  | 2.350546000  | -0.149358000 | 0.000000000  |
| C  | 3.076253000  | 1.149238000  | 0.000000000  |
| C  | 4.615915000  | 1.169977000  | 0.000000000  |
| C  | -1.542889000 | -1.473127000 | 1.310397000  |
| C  | -1.542889000 | -1.473127000 | -1.310397000 |
| C  | -2.236591000 | -2.048056000 | 2.340585000  |
| C  | -2.236591000 | -2.048056000 | -2.340585000 |
| C  | -2.266757000 | 0.144533000  | 2.607371000  |
| C  | -2.266757000 | 0.144533000  | -2.607371000 |
| H  | 2.150803000  | -3.312017000 | 0.000000000  |
| H  | 2.755275000  | 1.739516000  | 0.864115000  |
| H  | 2.755275000  | 1.739516000  | -0.864115000 |
| H  | 4.619562000  | -0.749730000 | 0.000000000  |
| H  | -0.858799000 | -3.310267000 | 0.000000000  |
| H  | -2.454570000 | -3.077754000 | 2.560773000  |
| H  | -2.454570000 | -3.077754000 | -2.560773000 |
| H  | -2.479476000 | 1.110703000  | 3.033701000  |
| H  | -2.479476000 | 1.110703000  | -3.033701000 |
| H  | -3.233923000 | -1.112930000 | 3.989198000  |
| H  | -3.233923000 | -1.112930000 | -3.989198000 |
| N  | 0.997232000  | -0.244563000 | 0.000000000  |
| N  | 2.973242000  | -1.364635000 | 0.000000000  |
| N  | -1.403127000 | 2.759408000  | 0.000000000  |
| N  | -1.576645000 | -0.090739000 | 1.513752000  |
| N  | -1.576645000 | -0.090739000 | -1.513752000 |
| N  | -2.690511000 | -1.019728000 | 3.147855000  |
| N  | -2.690511000 | -1.019728000 | -3.147855000 |
| O  | 5.191640000  | 2.225990000  | 0.000000000  |
| O  | 5.263107000  | 0.004165000  | 0.000000000  |
| O  | -0.230501000 | 3.038245000  | 0.000000000  |

**{CuNO}<sup>10</sup> - L2, Side-on, M<sub>s</sub> = 0 (BS)**

|    |              |              |              |
|----|--------------|--------------|--------------|
| Cu | 0.660618000  | -1.222287000 | 0.000000000  |
| B  | 1.408998000  | 1.815669000  | 0.000000000  |
| C  | 1.964083000  | 1.042767000  | 1.311559000  |
| C  | 1.964083000  | 1.042767000  | -1.311559000 |
| C  | 2.289428000  | -0.692943000 | 2.622378000  |
| C  | 2.289428000  | -0.692943000 | -2.622378000 |
| C  | 2.706405000  | 1.462426000  | 2.381636000  |
| C  | 2.706405000  | 1.462426000  | -2.381636000 |
| C  | -0.192717000 | 1.643428000  | 0.000000000  |
| C  | -1.274423000 | 2.631196000  | 0.000000000  |
| C  | -2.134512000 | 0.687692000  | 0.000000000  |
| C  | -3.162323000 | -0.389874000 | 0.000000000  |
| C  | -4.658419000 | -0.026810000 | 0.000000000  |
| H  | 1.728556000  | 2.982091000  | 0.000000000  |
| H  | 2.285869000  | -1.682655000 | 3.046820000  |
| H  | 2.285869000  | -1.682655000 | -3.046820000 |
| H  | 3.108313000  | 2.428899000  | 2.628120000  |
| H  | 3.108313000  | 2.428899000  | -2.628120000 |
| H  | 3.416101000  | 0.342618000  | 4.063953000  |
| H  | 3.416101000  | 0.342618000  | -4.063953000 |
| H  | -1.173307000 | 3.706500000  | 0.000000000  |
| H  | -2.997886000 | -1.040614000 | 0.864155000  |
| H  | -2.997886000 | -1.040614000 | -0.864155000 |
| H  | -4.177583000 | 1.831499000  | 0.000000000  |
| N  | 1.716212000  | -0.321276000 | 1.497735000  |
| N  | 1.716212000  | -0.321276000 | -1.497735000 |
| N  | 2.905948000  | 0.362320000  | 3.197297000  |
| N  | 2.905948000  | 0.362320000  | -3.197297000 |
| N  | -0.102565000 | -2.893453000 | 0.000000000  |
| N  | -0.804359000 | 0.440068000  | 0.000000000  |
| N  | -2.448313000 | 2.022173000  | 0.000000000  |
| O  | 0.062491000  | -4.049180000 | 0.000000000  |
| O  | -4.992969000 | 1.263578000  | 0.000000000  |
| O  | -5.481052000 | -0.905692000 | 0.000000000  |

**{CuNO}<sup>11</sup> - L2, Side-on, <sup>2</sup>A''**

|    |              |              |              |
|----|--------------|--------------|--------------|
| Cu | -0.561397000 | 0.993313000  | 0.000000000  |
| B  | -0.794824000 | -2.099206000 | 0.000000000  |
| C  | 0.733777000  | -1.568109000 | 0.000000000  |
| C  | 1.947368000  | -2.203649000 | 0.000000000  |
| C  | 2.333939000  | -0.032186000 | 0.000000000  |
| C  | 3.121985000  | 1.239789000  | 0.000000000  |
| C  | 4.697803000  | 1.120366000  | 0.000000000  |
| C  | -1.544723000 | -1.484117000 | 1.303217000  |
| C  | -1.544723000 | -1.484117000 | -1.303217000 |

|   |              |              |              |
|---|--------------|--------------|--------------|
| C | -2.222285000 | -2.053437000 | 2.348191000  |
| C | -2.222285000 | -2.053437000 | -2.348191000 |
| C | -2.239740000 | 0.139669000  | 2.617308000  |
| C | -2.239740000 | 0.139669000  | -2.617308000 |
| H | 2.185455000  | -3.252956000 | 0.000000000  |
| H | 2.849566000  | 1.842783000  | 0.869899000  |
| H | 2.849566000  | 1.842783000  | -0.869899000 |
| H | 3.971605000  | -1.193652000 | 0.000000000  |
| H | -0.856489000 | -3.314445000 | 0.000000000  |
| H | -2.429627000 | -3.083310000 | 2.579857000  |
| H | -2.429627000 | -3.083310000 | -2.579857000 |
| H | -2.437741000 | 1.107638000  | 3.048153000  |
| H | -2.437741000 | 1.107638000  | -3.048153000 |
| H | -3.166827000 | -1.114033000 | 4.033169000  |
| H | -3.166827000 | -1.114033000 | -4.033169000 |
| N | 1.009277000  | -0.193051000 | 0.000000000  |
| N | 2.927697000  | -1.230842000 | 0.000000000  |
| N | -1.482959000 | 2.696951000  | 0.000000000  |
| N | -1.579365000 | -0.098750000 | 1.508972000  |
| N | -1.579365000 | -0.098750000 | -1.508972000 |
| N | -2.657219000 | -1.023235000 | 3.171996000  |
| N | -2.657219000 | -1.023235000 | -3.171996000 |
| O | 5.204332000  | -0.042168000 | 0.000000000  |
| O | 5.285085000  | 2.211286000  | 0.000000000  |
| O | -0.318613000 | 3.043903000  | 0.000000000  |

**{CuNO}<sup>11</sup> - L2, End-on, <sup>2</sup>A''**

|    |              |              |              |
|----|--------------|--------------|--------------|
| Cu | 0.520460000  | 1.043518000  | 0.000000000  |
| B  | 1.117182000  | -2.008171000 | 0.000000000  |
| C  | 1.783204000  | -1.314305000 | 1.308120000  |
| C  | 1.783204000  | -1.314305000 | -1.308120000 |
| C  | 2.265894000  | 0.368055000  | 2.642867000  |
| C  | 2.265894000  | 0.368055000  | -2.642867000 |
| C  | 2.488907000  | -1.812950000 | 2.370821000  |
| C  | 2.488907000  | -1.812950000 | -2.370821000 |
| C  | -0.465019000 | -1.660301000 | 0.000000000  |
| C  | -1.591301000 | -2.440690000 | 0.000000000  |
| C  | -2.239779000 | -0.332490000 | 0.000000000  |
| C  | -3.178160000 | 0.834321000  | 0.000000000  |
| C  | -4.730610000 | 0.527365000  | 0.000000000  |
| H  | 1.317776000  | -3.208734000 | 0.000000000  |
| H  | 2.346554000  | 1.348710000  | 3.082846000  |
| H  | 2.346554000  | 1.348710000  | -3.082846000 |
| H  | 2.794761000  | -2.816595000 | 2.608151000  |
| H  | 2.794761000  | -2.816595000 | -2.608151000 |
| H  | 3.283012000  | -0.786370000 | 4.082193000  |
| H  | 3.283012000  | -0.786370000 | -4.082193000 |
| H  | -1.698430000 | -3.511299000 | 0.000000000  |
| H  | -2.981267000 | 1.465575000  | 0.870479000  |

|   |              |              |              |
|---|--------------|--------------|--------------|
| H | -2.981267000 | 1.465575000  | -0.870479000 |
| H | -3.721205000 | -1.691223000 | 0.000000000  |
| N | 0.863195000  | 2.827948000  | 0.000000000  |
| N | 1.665943000  | 0.066296000  | 1.515490000  |
| N | 1.665943000  | 0.066296000  | -1.515490000 |
| N | 2.789603000  | -0.746193000 | 3.207812000  |
| N | 2.789603000  | -0.746193000 | -3.207812000 |
| N | -0.905736000 | -0.328694000 | 0.000000000  |
| N | -2.683061000 | -1.595196000 | 0.000000000  |
| O | 1.491074000  | 3.826601000  | 0.000000000  |
| O | -5.093450000 | -0.686785000 | 0.000000000  |
| O | -5.443121000 | 1.541290000  | 0.000000000  |

**{CuNO}<sup>11</sup> - L2, End-on, <sup>2</sup>A'**

|    |              |              |              |
|----|--------------|--------------|--------------|
| Cu | -0.757371000 | 0.989735000  | 0.000000000  |
| B  | -0.835451000 | -2.118764000 | 0.000000000  |
| C  | 0.687356000  | -1.570348000 | 0.000000000  |
| C  | 1.901490000  | -2.207963000 | 0.000000000  |
| C  | 2.275071000  | -0.035795000 | 0.000000000  |
| C  | 3.059727000  | 1.240170000  | 0.000000000  |
| C  | 4.634896000  | 1.136282000  | 0.000000000  |
| C  | -1.587527000 | -1.518252000 | 1.306985000  |
| C  | -1.587527000 | -1.518252000 | -1.306985000 |
| C  | -2.188390000 | -2.106841000 | 2.387434000  |
| C  | -2.188390000 | -2.106841000 | -2.387434000 |
| C  | -2.285090000 | 0.084644000  | 2.645945000  |
| C  | -2.285090000 | 0.084644000  | -2.645945000 |
| H  | 2.140595000  | -3.257408000 | 0.000000000  |
| H  | 2.783372000  | 1.842122000  | 0.869652000  |
| H  | 2.783372000  | 1.842122000  | -0.869652000 |
| H  | 3.919168000  | -1.198893000 | 0.000000000  |
| H  | -0.883168000 | -3.335622000 | 0.000000000  |
| H  | -2.332269000 | -3.143092000 | 2.637708000  |
| H  | -2.332269000 | -3.143092000 | -2.637708000 |
| H  | -2.500170000 | 1.044534000  | 3.086295000  |
| H  | -2.500170000 | 1.044534000  | -3.086295000 |
| H  | -3.087444000 | -1.196283000 | 4.112193000  |
| H  | -3.087444000 | -1.196283000 | -4.112193000 |
| N  | 0.952802000  | -0.193863000 | 0.000000000  |
| N  | 2.878606000  | -1.233265000 | 0.000000000  |
| N  | -0.703005000 | 2.821911000  | 0.000000000  |
| N  | -1.673219000 | -0.133029000 | 1.504464000  |
| N  | -1.673219000 | -0.133029000 | -1.504464000 |
| N  | -2.624642000 | -1.090504000 | 3.226684000  |
| N  | -2.624642000 | -1.090504000 | -3.226684000 |
| O  | 5.153956000  | -0.020391000 | 0.000000000  |
| O  | 5.212708000  | 2.234330000  | 0.000000000  |
| O  | -0.098505000 | 3.825044000  | 0.000000000  |

## SUPPLEMENTARY DATA

**Movie S1:** MSOX movie at 190K movie constructed from 75 structures serially obtained from one crystal.

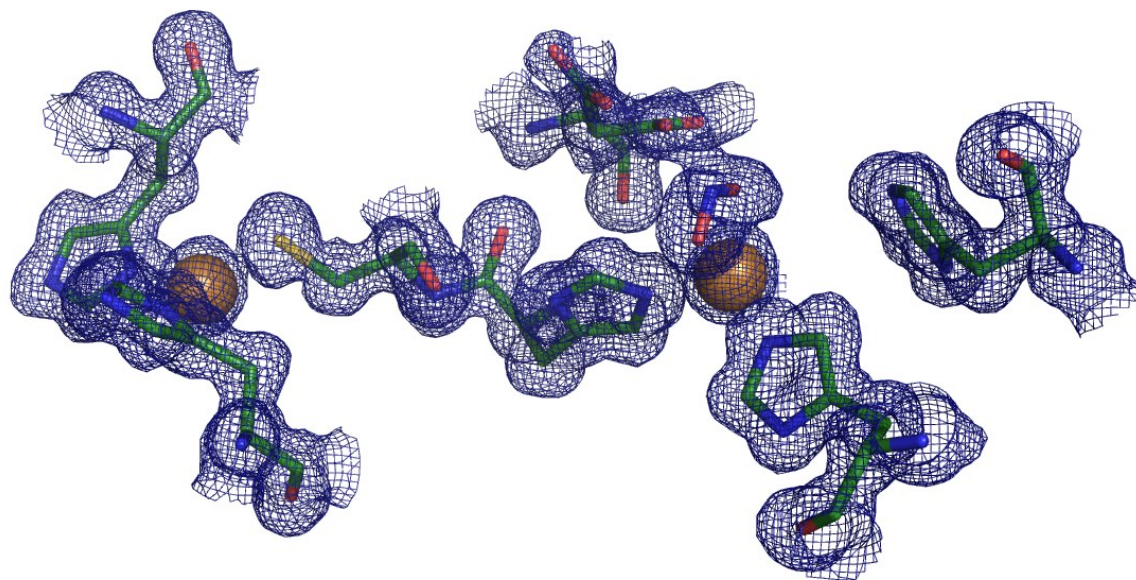

1.07 Å 0.24 MGy

**Movie S2:** MSOX movie at room temperature constructed from 10 structures serially obtained from one crystal.

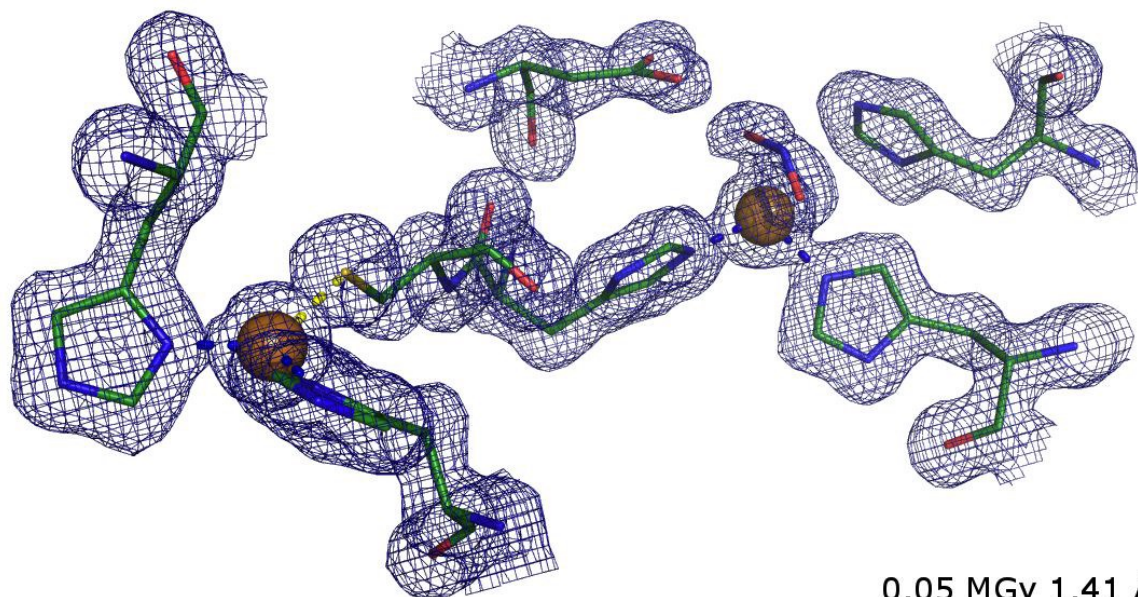

0.05 MGy 1.41 Å

**Table S1.** MSOX series of nitrite-soaked AcNiR at 170 K

| <b>Structure</b>                         | ds1 <sub>170</sub> | ds2 <sub>170</sub> | ds3 <sub>170</sub> | ds4 <sub>170</sub> | ds5 <sub>170</sub> |
|------------------------------------------|--------------------|--------------------|--------------------|--------------------|--------------------|
| Cell axis (Å)                            | 95.3               | 95.4               | 95.4               | 95.4               | 95.4               |
| Resolution (Å)                           | 42.6-1.15          | 42.6-1.08          | 42.6-1.10          | 42.6-1.14          | 42.6-1.15          |
| Unique reflections                       | 101516             | 122039             | 115774             | 104229             | 101537             |
| Redundancy                               | 5.1 (5.1)          | 4.8 (3.5)          | 4.9 (4.2)          | 5.0 (5.0)          | 5.1 (5.1)          |
| R <sub>pim</sub> (%)                     | 4.1 (31.1)         | 3.8 (36.3)         | 3.7 (33.2)         | 3.6 (29.5)         | 3.8 (32.5)         |
| I/σ(I)                                   | 9.3 (2.2)          | 8.5 (1.7)          | 8.5 (1.9)          | 9.1 (2.2)          | 8.6 (2.0)          |
| Completeness (%)                         | 99.5 (100)         | 99.2 (97.2)        | 99.4 (98.7)        | 99.5 (100)         | 99.5 (100)         |
| Wilson B-factor (Å <sup>2</sup> )        | 7.0                | 6.3                | 7.4                | 7.3                | 8.6                |
| <b>Refinement</b>                        |                    |                    |                    |                    |                    |
| R <sub>work</sub> /R <sub>free</sub> (%) | 11.9/15.5          | 12.4/15.0          | 12.3/15.5          | 12.2/15.6          | 12.3/16.5          |
| RMSD Bond Length (Å)                     | 0.02               | 0.02               | 0.02               | 0.02               | 0.02               |
| RMDS Bond Angle (°)                      | 2.1                | 2.4                | 2.5                | 2.5                | 2.5                |
| ML Based ESU (Å)                         |                    |                    |                    |                    |                    |
| Av Protein B-factor (Å <sup>2</sup> )    | 10.3               | 10.2               | 10.9               | 11.0               | 11.8               |
| Av Water B-factor (Å <sup>2</sup> )      | 26.6               | 24.5               | 30.5               | 28.0               | 31.2               |
| <b>Ramachandran (%)</b>                  |                    |                    |                    |                    |                    |
| Favoured Regions                         | 97.6               | 96.7               | 97.2               | 97.6               | 97.6               |
| PDB Code                                 | 6ZU6               | 6ZUB               | 6ZUD               | 6ZUA               | 6ZUT               |

**Table S2:** Distances, bond angles and occupancies for key residues in the catalytic pocket.

| Residues/<br>ligands                                                                | Data1    | Data2    | Data3    | Data4    | Data5     |
|-------------------------------------------------------------------------------------|----------|----------|----------|----------|-----------|
| <b>Asp98</b>                                                                        |          |          |          |          |           |
| <b>Proximal</b>                                                                     |          |          |          |          |           |
| <b>Occupancy</b>                                                                    | 0.54     | 0.51     | 0.67     | 0.73     | 0.82      |
| <b>C<math>\gamma</math>-O<math>\delta_1</math> (Å)</b>                              | 1.25 (8) | 1.25 (4) | 1.25 (3) | 1.25 (4) | 1.25 (3)  |
| <b>C<math>\gamma</math>-O<math>\delta_2</math> (Å)</b>                              | 1.26 (5) | 1.27 (4) | 1.28 (3) | 1.28 (4) | 1.30 (3)  |
| <b>Gate keeper</b>                                                                  |          |          |          |          |           |
| <b>Occupancy</b>                                                                    | 0.46     | 0.49     | 0.33     | 0.27     | 0.18      |
| <b>C<math>\gamma</math>-O<math>\delta_1</math> (Å)</b>                              | 1.24 (5) | 1.24 (4) | 1.25 (7) | 1.25 (9) | 1.25 (11) |
| <b>C<math>\gamma</math>-O<math>\delta_2</math> (Å)</b>                              | 1.27 (5) | 1.27 (4) | 1.26 (7) | 1.26 (9) | 1.26 (12) |
| <b>His255</b>                                                                       |          |          |          |          |           |
| <b>Part 1</b>                                                                       |          |          |          |          |           |
| <b>Occupancy</b>                                                                    | 1.0      |          | 0.79     | 0.63     |           |
| <b>C<math>\epsilon_1</math>-N<math>\epsilon_2</math>-C<math>\delta_2</math> (°)</b> | 107 (2)  | 107 (2)  | 106 (4)  | 107 (4)  |           |
| <b>C<math>\gamma</math> -N<math>\delta_1</math>-C<math>\epsilon_1</math> (°)</b>    | 110 (2)  | 111 (2)  | 114 (6)  | 112 (5)  |           |
| <b>Part 2</b>                                                                       |          |          |          |          |           |
| <b>Occupancy</b>                                                                    |          |          | 0.21     | 0.37     | 1.00      |
| <b>C<math>\epsilon_1</math>-N<math>\epsilon_2</math>-C<math>\delta_2</math> (°)</b> | -        | -        | 109 (10) | 108 (7)  | 107 (3)   |
| <b>C<math>\gamma</math> -N<math>\delta_1</math>-C<math>\epsilon_1</math> (°)</b>    | -        | -        | 110 (10) | 110 (10) | 111 (3)   |
|                                                                                     |          |          |          |          |           |



|                                                                    |          |          |          |           |           |
|--------------------------------------------------------------------|----------|----------|----------|-----------|-----------|
| <b>NO<sub>2</sub></b>                                              |          |          |          |           |           |
| <b>Occupancy</b>                                                   | 0.75     | 0.68     | 0.55     | 0.40      |           |
| <b>B<sub>O1</sub>-B<sub>N</sub>-B<sub>O2</sub> (Å<sup>2</sup>)</b> | 17-19-15 | 17-20-20 | 18-20-18 | 20-19-20  |           |
| <b>N-O<sub>1</sub> (Å)</b>                                         | 1.23 (4) | 1.24 (5) | 1.23 (6) | 1.24 (9)  |           |
| <b>N-O<sub>2</sub> (Å)</b>                                         | 1.23 (4) | 1.24 (5) | 1.24 (7) | 1.25 (16) |           |
| <b>O<sub>1</sub>-N-O<sub>2</sub> (°)</b>                           | 130 (4)  | 138 (5)  | 139 (6)  | 140 (10)  |           |
|                                                                    |          |          |          |           |           |
| <b>NO</b>                                                          |          |          |          |           |           |
| <b>Occupancy</b>                                                   |          |          |          | 0.30      | 0.35      |
| <b>B<sub>O</sub>-B<sub>N</sub> (Å<sup>2</sup>)</b>                 |          |          |          | 21-20     | 22-22     |
| <b>N-O (Å)</b>                                                     | -        | -        |          | 1.16 (20) | 1.15 (20) |
|                                                                    |          |          |          |           |           |
| <b>W1</b>                                                          |          |          |          |           |           |
| <b>Occupancy</b>                                                   |          | 0.32     | 0.45     | 0.30      | 0.45      |
| <b>B factor (Å<sup>2</sup>)</b>                                    |          | 13.1     | 14.0     | 9.05      | 10.40     |
